# Supplementary material for: Genome-wide association study reveals white lupin candidate gene involved in anthracnose resistance
Source: PubMed Central journal article supplement (PMC8942938; doi:10.1007/s00122-021-04014-7), 2022-01-05
Supplement: 122_2021_4014_MOESM1_ESM.pdf [file 122_2021_4014_MOESM1_ESM.pdf]

**Article Title**

Genome-wide association study reveals white lupin candidate gene involved in anthracnose resistance

**Journal**

Theoretical Applied Genetics

**Authors**

Joris A. Alkemade<sup>1</sup>, Nelson Nazzicari<sup>2</sup>, Monika M. Messmer<sup>1\*</sup>, Paolo Annicchiarico<sup>2</sup>, Barbara Ferrari<sup>2</sup>, Ralf T. Voegelé<sup>3</sup>, Maria R. Finckh<sup>4</sup>, Christine Arncken<sup>1</sup>, Pierre Hohmann<sup>1</sup>

1 Department of Crop Sciences, Research Institute of Organic Agriculture (FiBL), Frick, Switzerland

2 CREA, Research Centre for Animal Production and Aquaculture, Lodi, Italy

3 Institute of Phytomedicine, University of Hohenheim, Stuttgart, Germany

4 Department of Ecological Plant Protection, University of Kassel, Witzenhausen, Germany

\* Corresponding author:

Email: [monika.messmer@fibl.org](mailto:monika.messmer@fibl.org)

## ESM\_2: Primers used for library preparation.

| Primers    | Sequence                                                                          |
|------------|-----------------------------------------------------------------------------------|
| PCRprimer1 | AAT GAT ACG GCG ACC ACC GAG ATC TAC ACT CTT TCC CTA CAC GAC GCT CTT CCG ATC T     |
| PCRprimer2 | CAA GCA GAA GAC GGC ATA CGA GAT CGG TCT CGG CAT TCC TGC TGA ACC GCT CTT CCG ATC T |

## ESM\_4: Correlation between disease assessments under controlled and three-year Swiss field conditions<sup>a</sup>.

|                       | sAUDPC Field | Yield (dt/ha) Field | sAUDPC CC | LS <sub>rel</sub> CC | SFW <sub>rel</sub> CC |
|-----------------------|--------------|---------------------|-----------|----------------------|-----------------------|
| sAUDPC Field          | 1.00         |                     |           |                      |                       |
| Yield (dt/ha) Field   | -0.79*       | 1.00                |           |                      |                       |
| sAUDPC CC             | 0.86*        | -0.56*              | 1.00      |                      |                       |
| LS <sub>rel</sub> CC  | 0.87*        | -0.61*              | 0.96*     | 1.00                 |                       |
| SFW <sub>rel</sub> CC | -0.80*       | 0.53*               | -0.92*    | -0.86*               | 1.00                  |

<sup>a</sup> sAUDPC = standardized area under the disease progress curve, LS<sub>rel</sub> = relative lesion size (%), SFW<sub>rel</sub> = relative shoot fresh weight, CC = controlled conditions, correlations are expressed as Pearson correlation coefficients. \*  $P \leq 0.05$ , •  $P \leq 0.1$ .

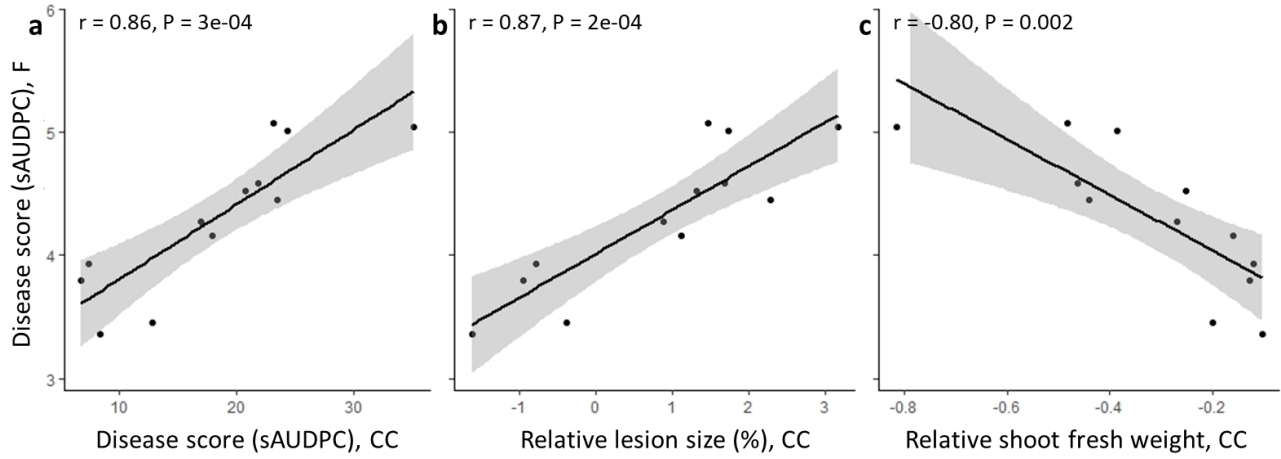

**ESM\_5: Correlations between anthracnose-related traits assessed under controlled conditions and three-year averaged disease scores assessed in the field.** CC = controlled conditions, F = field, sAUDPC = standardized area under the disease progress curve,  $r$  = Pearson correlation coefficient.

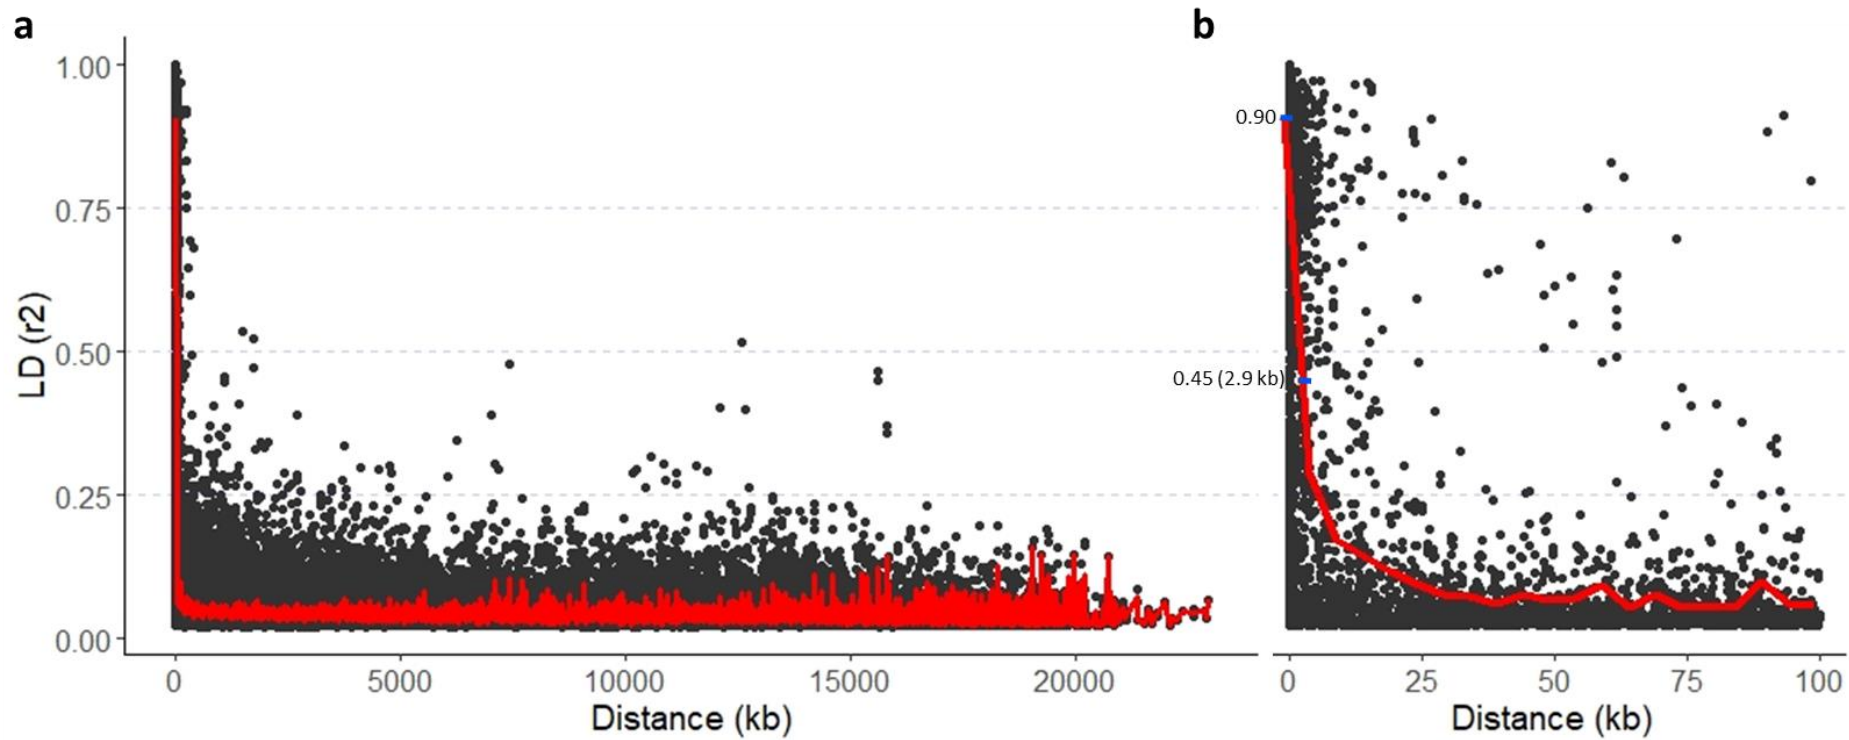

**ESM\_6: Genome-wide linkage disequilibrium (LD) decay based on 181 white lupin accessions. a:** Whole genome ~23000 kb. **b:** 100 kb, the decay of LD with physical distance between SNPs to half of the maximum values occurred at 2.9 kb ( $r^2 = 0.45$ ).

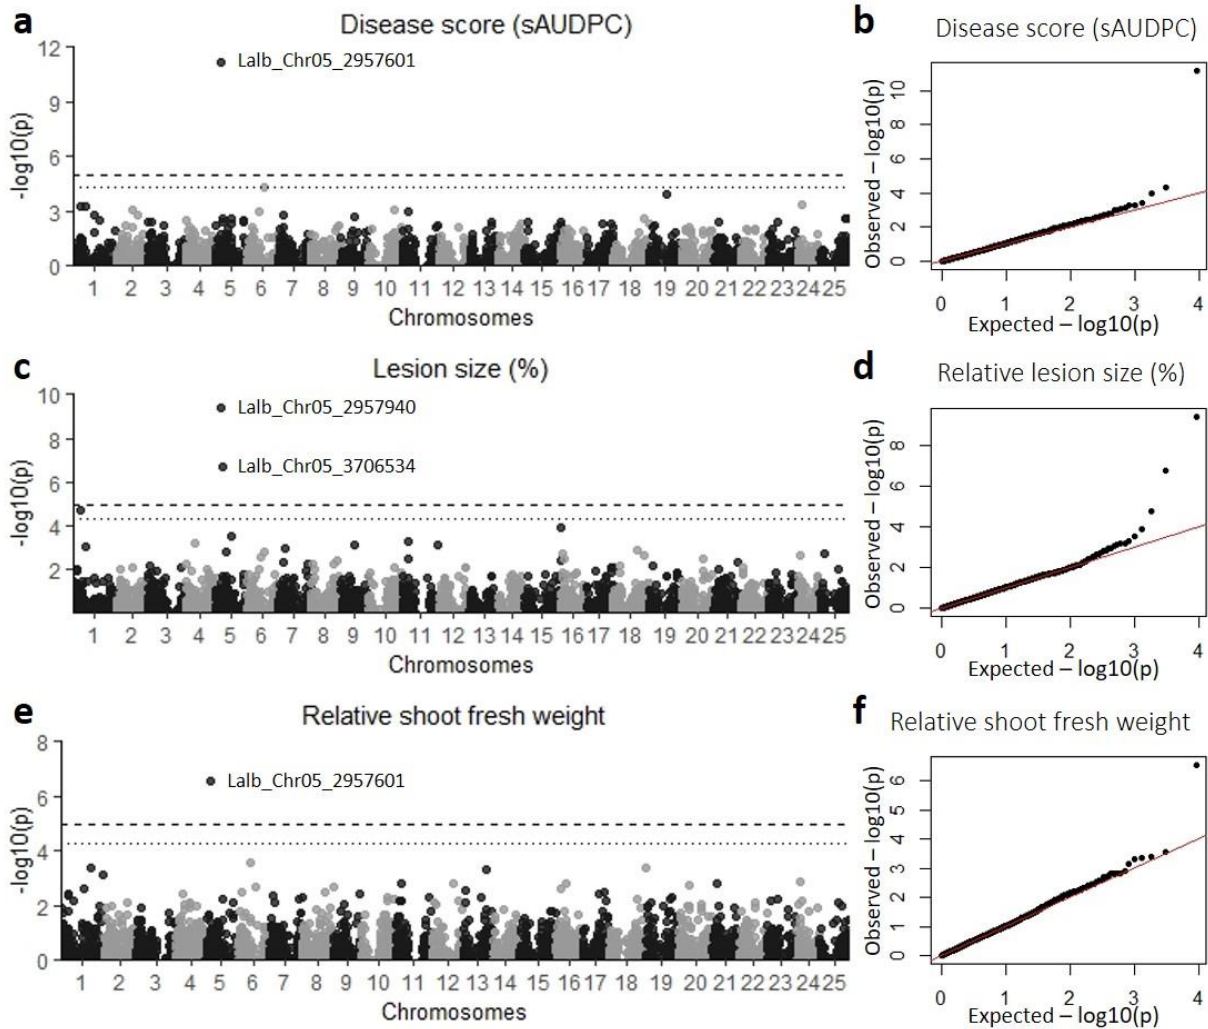

**ESM\_7: Manhattan and corresponding Q-Q plots by BLINK showing SNP association with anthracnose resistance. a-b:** Disease score (standardized area under the disease progress curve (sAUDPC)). **c-d:** Relative lesion size (%). **e-f:** Relative shoot fresh weight. Upper dashed line indicates Bonferroni corrected LOD threshold of 4.96 ( $P = 1.08E-05$ ) and lower dotted line indicates fixed LOD threshold of 4.3 ( $P = 5.00E-05$ ).

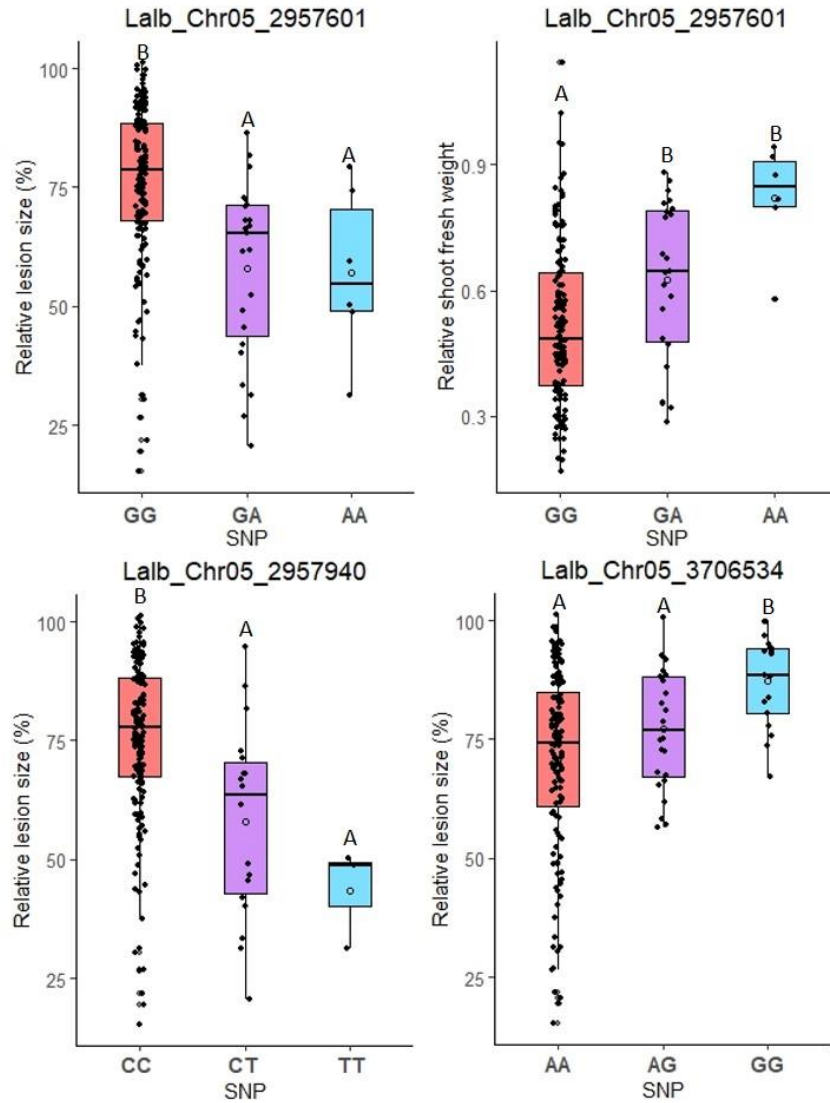

**ESM\_8: Boxplots showing allele effect on relative lesion size (%) and relative shoot fresh weight for SNPs associated with anthracnose resistance.** Capital letters within plot indicate significant difference (Tukey-HSD,  $P \leq 0.05$ ). Bonferroni LOD threshold of 4.96 ( $P = 1.08E-05$ ) was used to identify significant SNPs.

**ESM\_9: SNPs above fixed threshold and associated linked SNPs and candidate genes <sup>a</sup>.**

| Trait                       | SNP <sup>b</sup>                      | Allele | P value<br>MLM | P value<br>BLINK | R <sup>2</sup> <sub>LR</sub> | MAF  | Candidate gene(s)         | Location <sup>c</sup> | Annotation                                                             |
|-----------------------------|---------------------------------------|--------|----------------|------------------|------------------------------|------|---------------------------|-----------------------|------------------------------------------------------------------------|
| Disease Score (sAUDPC)      | Lalb_Chr06_9655085                    | A/G    | 5.56E-04       | 4.76E-05         | 0.06                         | 0.07 | <i>Lalb_Chr06g0172191</i> | Intron                | PPC domain-containing protein                                          |
| Relative Lesion size (%)    | Lalb_Chr01_3872625                    | A/T    | 7.40E-04       | 1.83E-05         | 0.06                         | 0.32 | <i>Lalb_Chr01g0006951</i> | Intron                | Glucan endo-1,3-beta-D-glucosidase                                     |
|                             |                                       |        |                |                  |                              |      | <i>Lalb_Chr01g0006961</i> | 2.5 kb >              | Winged helix-turn-helix DNA-binding domain, leucine-rich repeat domain |
|                             |                                       |        |                |                  |                              |      | <i>Lalb_Chr01g0006941</i> | 2 kb <                | Putative chromatin regulator PHD family                                |
|                             | <i>Lalb_Chr05_3688076<sup>d</sup></i> | A/G    | 0.52           | 0.54             | 0.00                         | 0.16 | <i>Lalb_Chr05g0217331</i> | Exon                  | RNA helicase                                                           |
|                             | <i>Lalb_Chr05_3784474<sup>d</sup></i> | A/G    | 0.68           | 0.87             | 0.00                         | 0.15 | <i>Lalb_Chr05g0217471</i> | Exon                  | LRR receptor serine/threonine-protein kinase                           |
| Relative shoot fresh weight | Lalb_Chr13_12108967                   | G/A    | 2.52E-05       | 4.79E-04         | 0.09                         | 0.43 | <i>Lalb_Chr13g0297911</i> | Exon                  | Protease Do-like 9                                                     |
|                             |                                       |        |                |                  |                              |      | <i>Lalb_Chr13g0297901</i> | 3 kb <                | RING-H2 finger protein                                                 |
|                             | <i>Lalb_Chr13_12143224</i>            | C/A    | 1.22E-02       | 1.41E-02         | 0.03                         | 0.09 | <i>Lalb_Chr13g0297971</i> | Intron                | Betaine aldehyde dehydrogenase                                         |

<sup>a</sup> SNP = Single-nucleotide polymorphism, MAF = minor allele frequency, R<sup>2</sup><sub>LR</sub> = likelihood-ratio-based R<sup>2</sup>, sAUDPC = standardized area under the disease progress curve, fixed LOD threshold is 4.3 ( $P = 5.00E-05$ ). <sup>b</sup> Lalb = *Lupinus albus*, Chr = chromosome, number = position on chromosome. <sup>c</sup> < = downstream, > = upstream. <sup>d</sup> Linked to SNP Lalb\_Chr05\_3706534, see **Table 1**.
